# Supplementary material for: Tubular cell polyploidy protects from lethal acute kidney injury but promotes consequent chronic kidney disease
Source: PubMed Central journal article supplement (PMC9532438; doi:10.1038/s41467-022-33110-5), 2022-10-04
Supplement: 41467_2022_33110_MOESM1_ESM.pdf [file 41467_2022_33110_MOESM1_ESM.pdf]

**Tubular cell polyploidy protects from lethal Acute Kidney Injury but promotes consequent  
Chronic Kidney Disease**

De Chiara L. et al.

**Supplementary Information**

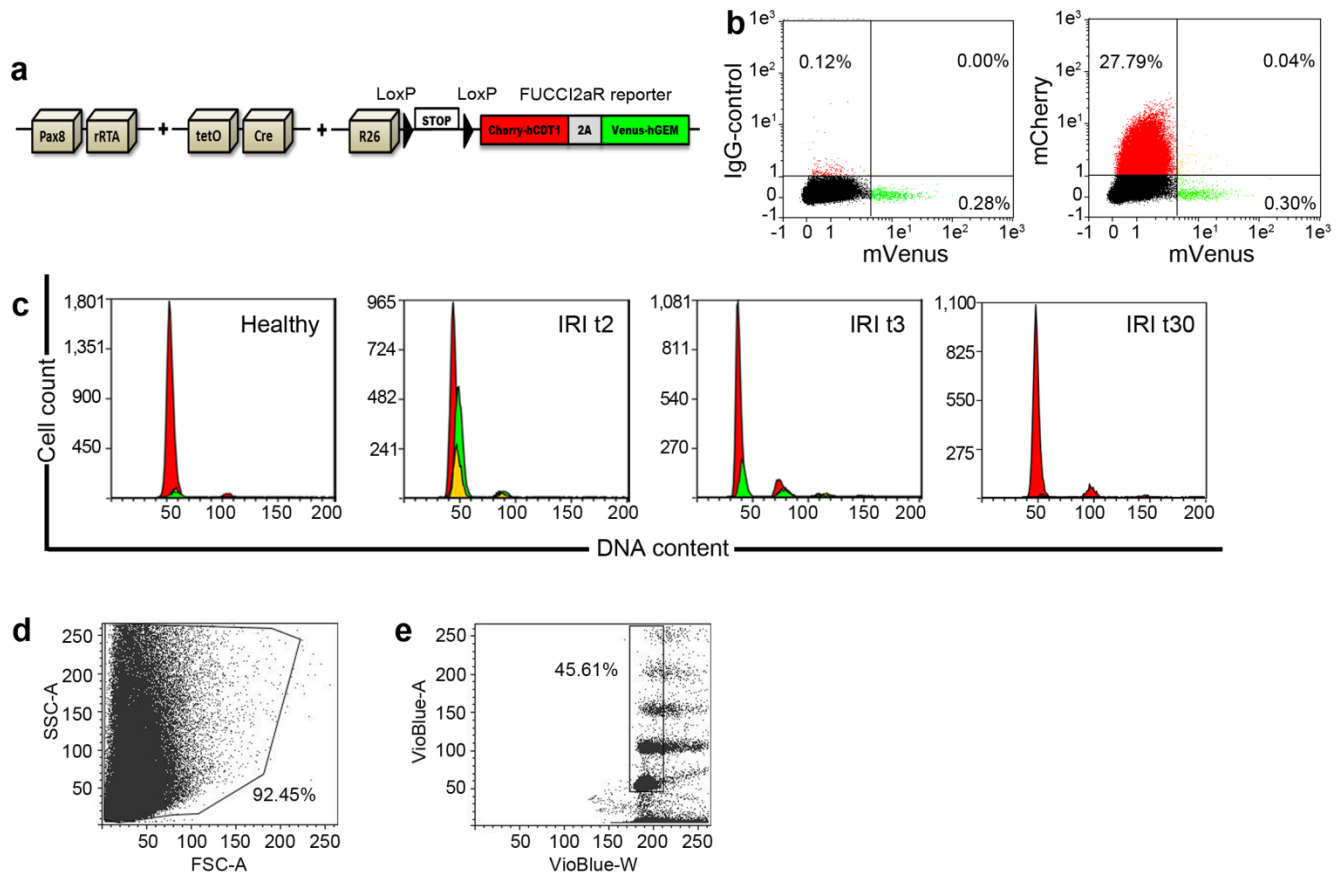

**Supplementary Fig. 1. PAX8/FUCCI2aR mouse model and gating strategy.** (a) The inducible Pax8.rtTA;TetO.Cre;R26.FUCCI2aR (Pax8/FUCCI2aR) mouse is produced by crossing the Pax8.rtTA transgenic mice with TetO.Cre and Rosa26-FUCCI2aR transgenic mice. Recombination is triggered upon doxycycline administration. (b) FACS analysis of healthy Pax8/FUCCI2aR mice (n=6). (c) Cell cycle distribution of mCherry<sup>+</sup>, mVenus<sup>+</sup>, and mCherry<sup>+</sup>mVenus<sup>+</sup> TC in healthy and at day 2 (t2), 3 (t3) and 30 (t30) after ischemic reperfusion injury (IRI) in Pax8/FUCCI2aR mice. (d, e) Gating strategy to avoid counting cell doublets as a potential source of artifacts of freshly isolated total renal cells. A representative experiment out of 6 is shown.

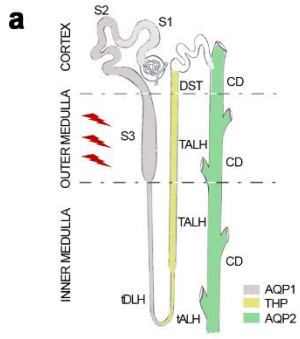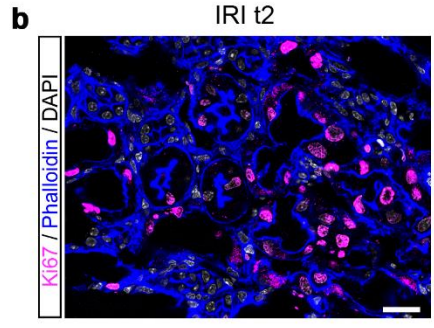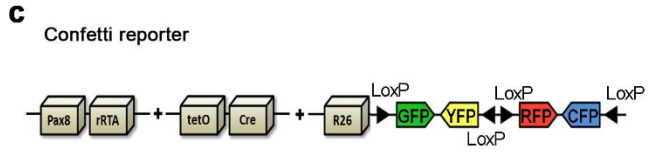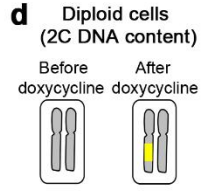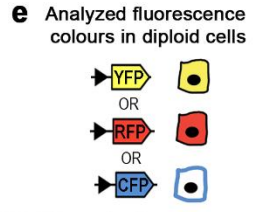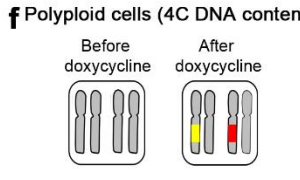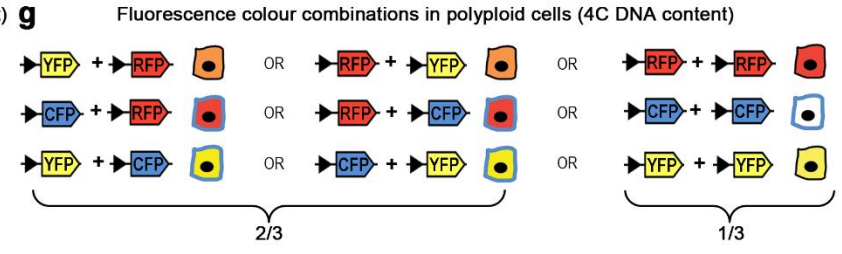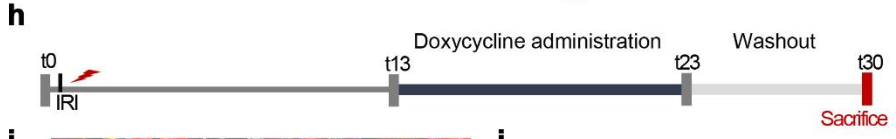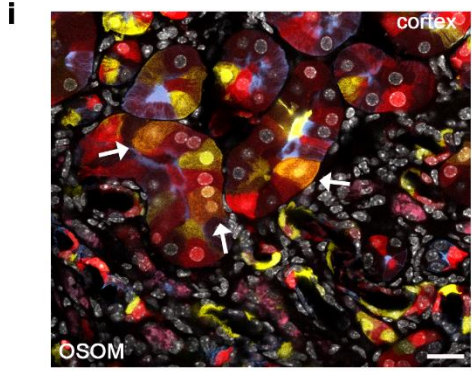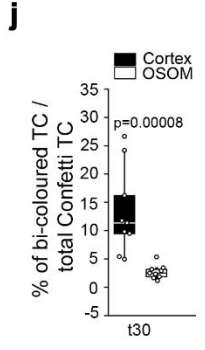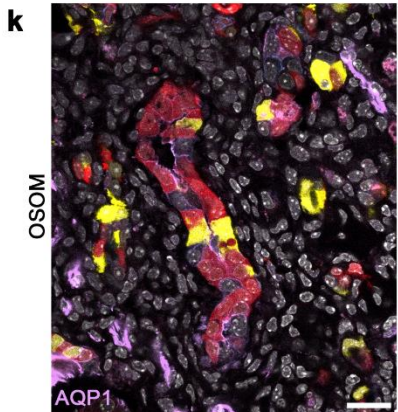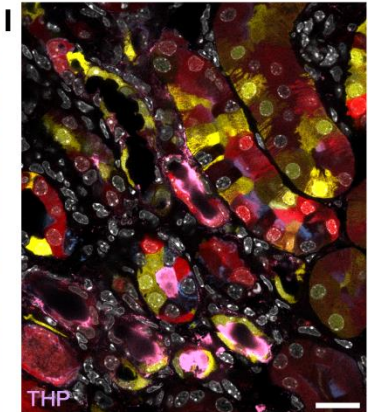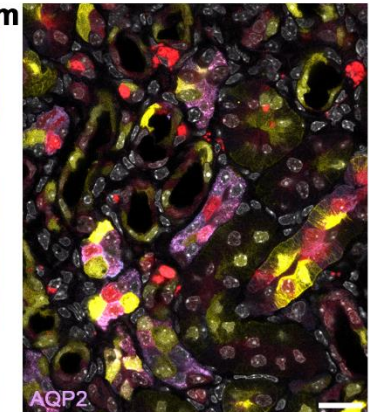

**Supplementary Fig. 2. Polyploid tubular cells (TC) can be identified by the Confetti reporter.** (a) Schematic localization of injury in the S3 segment of the nephron. (b) Representative picture showing Ki67<sup>+</sup> Phalloidin<sup>+</sup> TC 2 days (t2) after ischemic reperfusion injury (IRI). DAPI counterstains nuclei. Bar 25µm. A representative experiment out of 3 is shown. (c) The inducible heterozygous Pax8.rTA;TetO.Cre;R26.Confetti (Pax8/Confetti) mouse is produced by crossing the Pax8.rTA transgenic mice with TetO.Cre and Rosa26-Confetti transgenic mice. Recombination is triggered upon doxycycline administration. (d) Schematic representation of the Confetti reporter-based model in diploid TC before and after doxycycline administration in heterozygous Pax8/Confetti mice. (e) Analyzed fluorescence colours (yellow, YFP, red, RFP and cyan, CFP) in diploid TC. (f) Schematic representation of the Confetti reporter-based model in polyploid TC before and after doxycycline administration in heterozygous Pax8/Confetti mice. (g) Possible fluorescence colour combinations in polyploid TC with 4C DNA content, when the three fluorescence colours (YFP, RFP, CFP) are evaluated. Numbers indicate the expected probability of bi-coloured TC and mono-coloured TC. Fluorescence colour combinations that generate bi-coloured polyploid TC were evaluated. (h) Schematic representation of doxycycline schedule in Pax8/Confetti mice after IRI. Sham-control mice underwent the same doxycycline schedule without IRI. (i) Representative picture of the cortex and the OSOM in a heterozygous Pax8/Confetti mouse showing distribution of polyploid TC. Arrows indicate bi-coloured polyploid TC. DAPI counterstains nuclei. Bar 20µm. (j) Percentage of bi-coloured TC on total Confetti TC localized in the cortex or in the OSOM of heterozygous Pax8/Confetti mice after IRI (n=9). (k) AQP1, (l) THP and (m) AQP2 staining in the OSOM of heterozygous Pax8/Confetti mice 30 days after IRI. DAPI counterstains nuclei. Bar 20 µm. S1: S1 segment of proximal tubule, S2: S2 segment of proximal tubule, S3: S3 segment of proximal tubule, tDLH: thin descending limb of loop of Henle, tALH: thin ascending limb of loop of Henle, TALH: thick ascending limb of loop of Henle, DST: distal straight tubule, CD: collecting duct. OSOM: outer stripe of outer medulla; AQP1: Aquaporin-1; THP: Tamm-Horsfall

protein; AQP2: Aquaporin-2. Statistical significance was calculated by two-sided Mann-Whitney test; number on graph represent exact p value. Box-and-whisker plots: line = median, box =25-75%, whiskers = outlier (coef. 1.5).

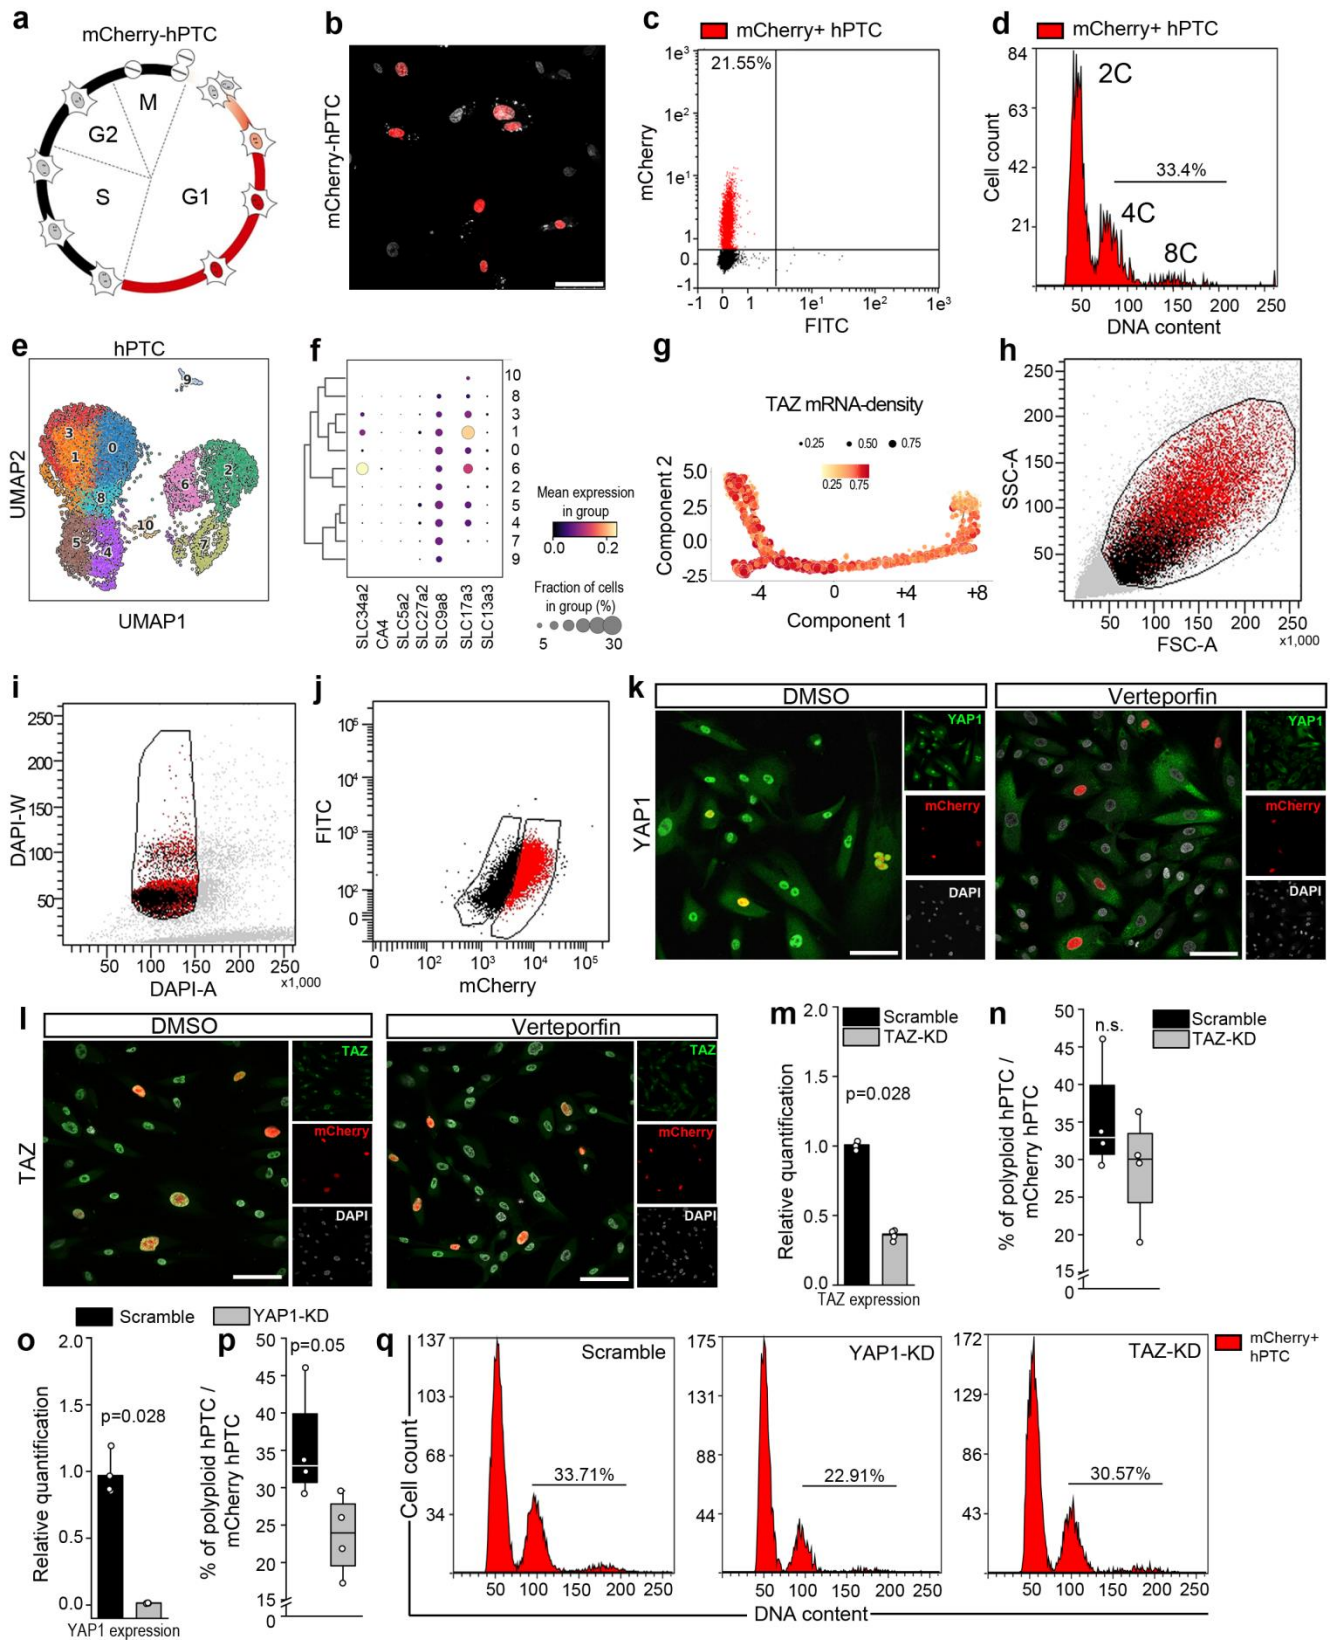

**Supplementary Fig. 3. Human proximal tubular cell (hPTC) polyploidization is controlled by YAP1.** (a) Scheme of the pRetroX-G1-Red (mCherry-G1) retrovirus. G1, gap 1 phase; S, synthesis; G2, gap 2 phase; M, mitosis. (b) Representative picture of mCherry-hPTC. DAPI counterstains nuclei. Bar 75 $\mu$ m. (c) FACS analysis of mCherry-hPTC. An experiment out of 6 is shown. (d) Cell cycle distribution of mCherry-hPTC showing DNA content. A representative experiment out of 6 is shown. (e) UMAP showing hPTC clusters. (f) Dot plot of solute carrier family (Slc) gene expression. Based on the Slc expression, clusters 1 and 6 were excluded from the trajectory analysis as they belong to other portions of the nephron. (g) Monocle2 trajectory of hPTC coloured by pseudotime showing TAZ mRNA density. (h-j) FACS analysis of mCherry-hPTC showing the gating strategy for sorting. A representative experiment out of 4 is shown. (k) YAP1 immunofluorescence in mCherry-hPTC treated with DMSO or verteporfin. DAPI counterstains nuclei. Bars 75 $\mu$ m. A representative experiment out of 6 is shown. (l) TAZ immunofluorescence in mCherry-hPTC treated with DMSO or verteporfin. DAPI counterstains nuclei. Bars 75 $\mu$ m. A representative experiment out of 4 is shown. (m) Knock-down (KD) efficiency of TAZ GapmeRs (n=4). (n) Percentage of polyploid mCherry-hPTC in TAZ-KD or scramble-treated culture (n=4). (o) KD efficiency of YAP1 GapmeRs (n=4). (p) Percentage of polyploid mCherry-hPTC in YAP1-KD or scramble-treated culture (n=4). (q) Cell cycle distribution of mCherry-hPTC transfected with scramble, YAP1 or TAZ GapmeRs. A representative experiment out of 4 is shown. Statistical significance was calculated by two-sided Mann-Whitney test; numbers on graphs represent exact p values. Box-and-whisker plots: line = median, box =25-75%, whiskers = outlier (coef. 1.5). Bar plots: line = mean, whiskers = outlier (coef. 1.5).

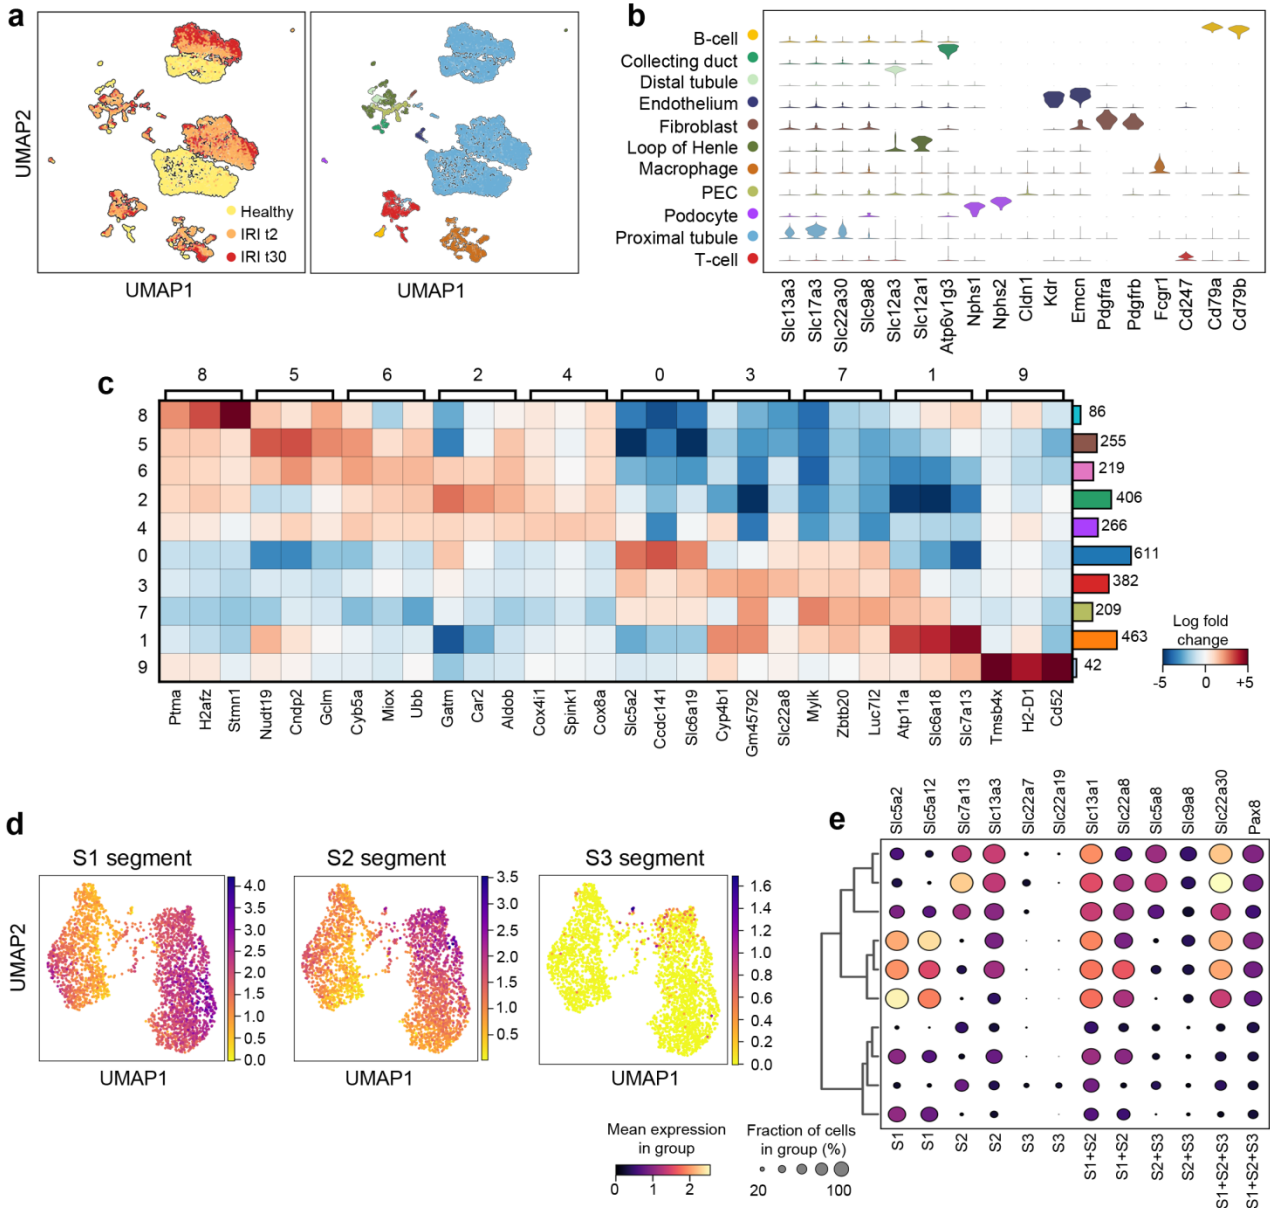

**Supplementary Fig. 4. Single cell RNA-sequencing on mouse kidney after ischemic injury.** (a) UMAP of sample distribution and cell population retrieved in healthy kidney (n=1) and at day 2 (t2, n=2) and 30 (t30, n=3) after ischemic reperfusion injury (IRI). (b) Violin plot displaying gene expression patterns of cluster-enriched markers. (c) Matrix plot showing the top three cluster marker genes. Numbers indicate the number of cells composing each cluster. (d) UMAP of gene distribution for S1, S2 and S3 segments. (e) Dot plot of solute carrier family (Slc) gene expression identifying S1, S2 and S3 segments.



S1: S1 segment of proximal tubule, S2: S2 segment of proximal tubule, S3: S3 segment of proximal tubule.

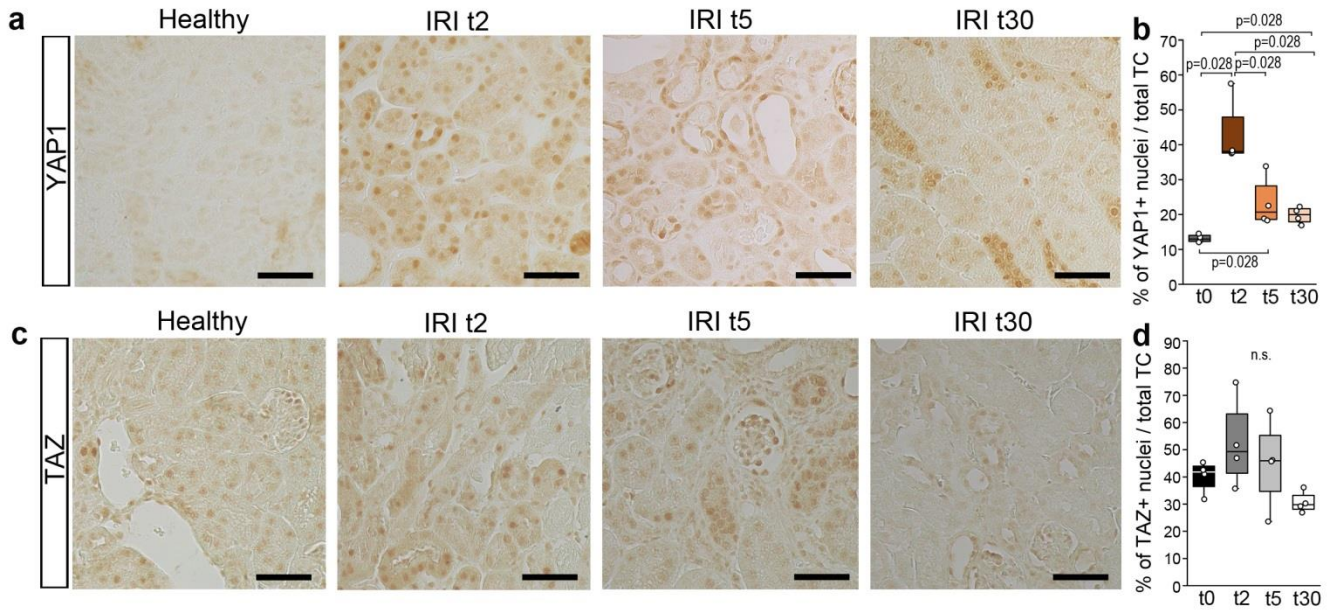

**Supplementary Fig. 5. YAP1 but not TAZ is upregulated following ischemic injury.** (a) Representative pictures of YAP1 expression in healthy kidney and at day 2, 5 and 30 after IRI. Bars 50 $\mu$ m. (b) Percentage of YAP1+ TC nuclei on total TC in healthy kidney (t0) and at day 2, 5 and 30 after IRI (n=4). (c) Representative pictures of TAZ expression in healthy kidney and at day 2, 5 and 30 after IRI. Bars 50 $\mu$ m. (d) Percentage of TAZ+ TC nuclei on total TC in healthy kidney (t0) and at day 2, 5 and 30 after IRI (n=4). IRI: ischemia reperfusion injury. t2: day2 after IRI; t5: day 5 after IRI; t30: day 30 after IRI. Statistical significance was calculated by two-sided Mann-Whitney test; numbers on graph represent exact p values. Box-and-whisker plots: line = median, box =25-75%, whiskers = outlier (coef. 1.5).

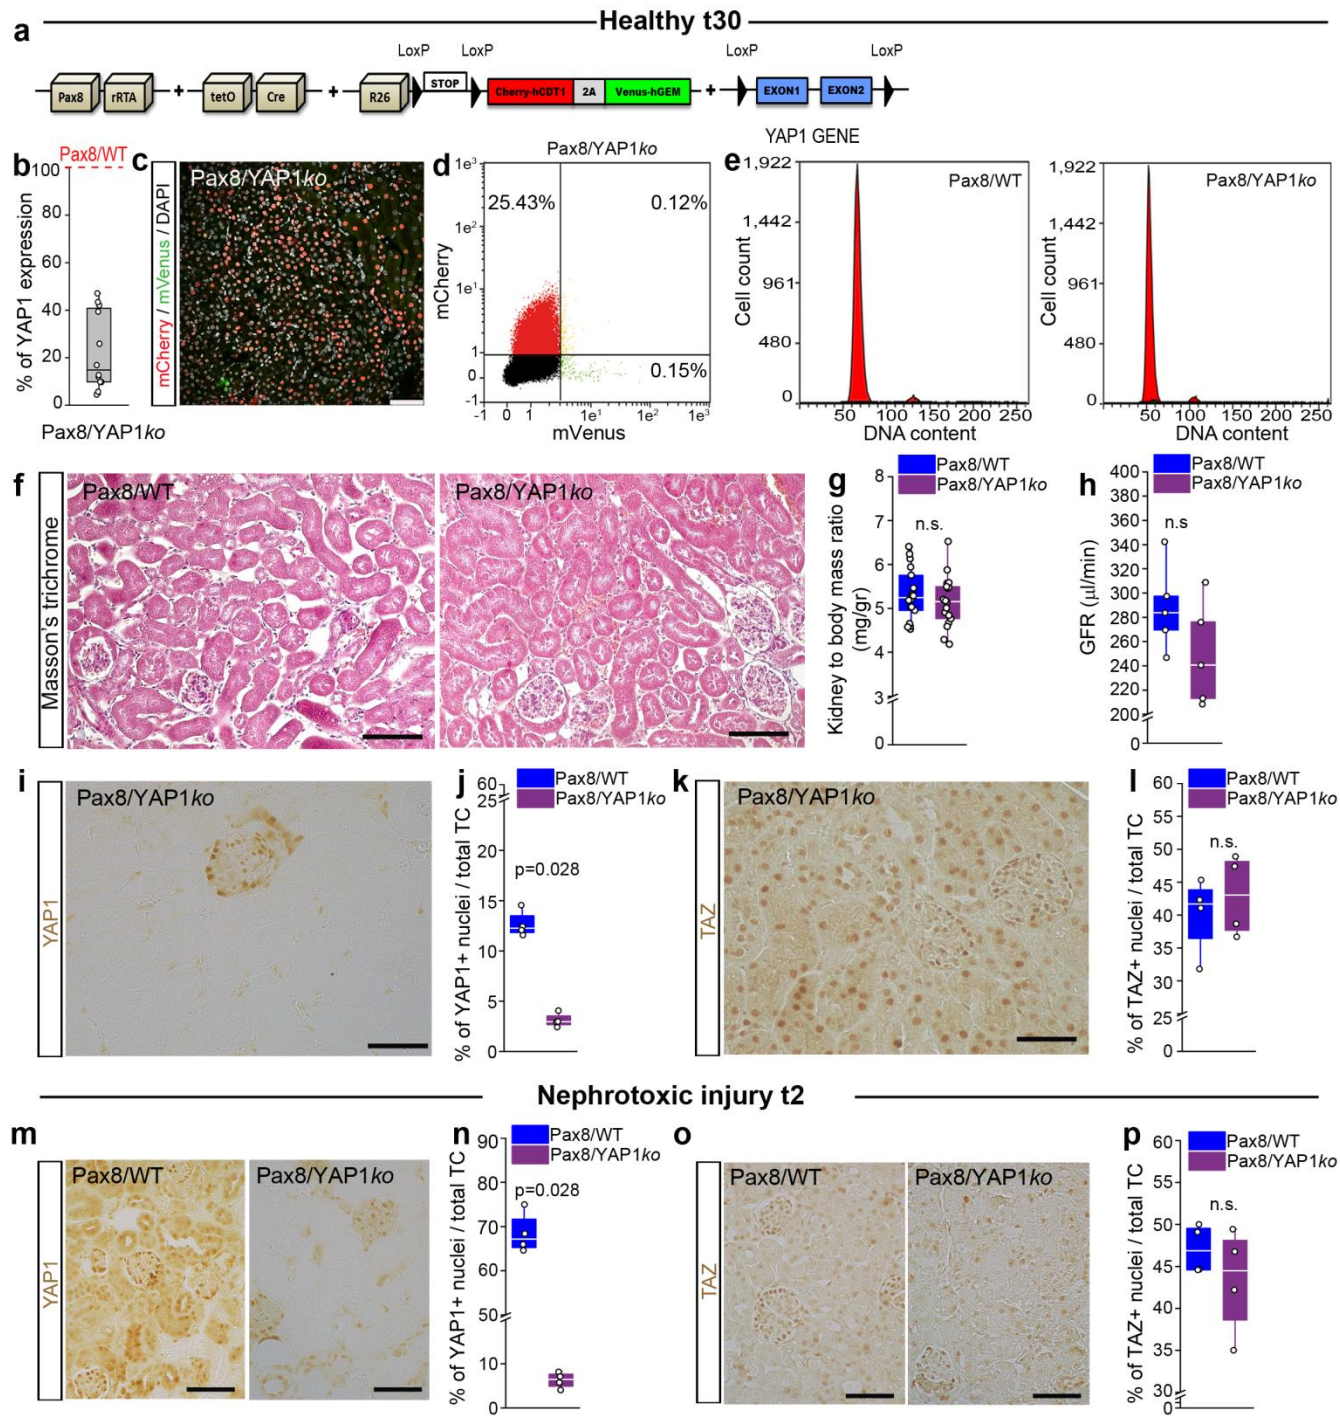

**Supplementary Fig. 6. YAP1 but not TAZ is differentially expressed in Pax8/YAP1ko.** (a) The inducible Pax8.rTA;TetO.Cre;R26.FUCCI2aR;YAP1knock-out (Pax8/YAP1ko) mouse is produced by crossing the Pax8.rTA transgenic mice with TetO.Cre and Rosa26-FUCCI2aR transgenic mice with

*YAP1<sup>fl/fl</sup>*. Recombination is triggered upon doxycycline administration. (b) YAP1 mRNA expression by qRT-PCR analysis. Percentage of YAP1 expression is normalized on YAP1 expression in healthy kidneys (n=10 replicates are shown). (c) Representative picture of healthy Pax8/YAP1*ko*, showing colours of the reporter. DAPI counterstains nuclei. Bar 50µm. A representative experiment out of 4 is shown. (d) FACS analysis of Pax8/YAP1*ko* mice (n=6). (e) Cell cycle distribution of mCherry<sup>+</sup>, mVenus<sup>+</sup>, and mCherry<sup>+</sup>mVenus<sup>+</sup> tubular cells (TC) in healthy Pax8/WT mice and in Pax8/YAP1*ko* mice (n=6). (f) Representative pictures of Masson's trichrome of healthy Pax8/WT and Pax8/YAP1*ko* mice (n=5). Bars 100µm. (g) Kidney weight on total body weight in healthy Pax8/WT and in Pax8/YAP1*ko* mice (n=18). (h) Glomerular filtration rate (GFR) measurement at day 30 after doxycycline induction in healthy Pax8/WT and in Pax8/YAP1*ko* mice (n=5). (i) Representative picture of YAP1 expression in healthy Pax8/YAP1*ko* mice. Bar 50µm. (j) Percentage of YAP1<sup>+</sup> TC nuclei on total TC in healthy Pax8/WT and in Pax8/YAP1*ko* mice (n=4). (k) Representative picture of TAZ expression in healthy Pax8/YAP1*ko* mice. Bar 50µm. (l) Percentage of TAZ<sup>+</sup> TC nuclei on total TC in healthy Pax8/WT and in Pax8/YAP1*ko* mice (n=4). (m) Representative pictures of YAP1 expression in Pax8/WT and in Pax8/YAP1*ko* mice 2 days after nephrotoxic AKI. Bars 50µm. (n) Percentage of YAP1<sup>+</sup> TC nuclei on total TC in healthy Pax8/WT and Pax8/YAP1*ko* mice 2 days after nephrotoxic AKI (n=4). (o) Representative pictures of TAZ expression in Pax8/WT and in Pax8/YAP1*ko* mice 2 days after nephrotoxic AKI. Bars 50µm. (p) Percentage of TAZ<sup>+</sup> TC nuclei on total TC in healthy Pax8/WT and in Pax8/YAP1*ko* mice 2 days after nephrotoxic AKI (n=4). t30: 30 days after doxycycline induction, t2: 2 days after nephrotoxic injury. Statistical significance was calculated by two-sided Mann-Whitney test; numbers on graphs represent exact p values. Box-and-whisker plots: line = median, box =25-75%, whiskers = outlier (coef. 1.5).

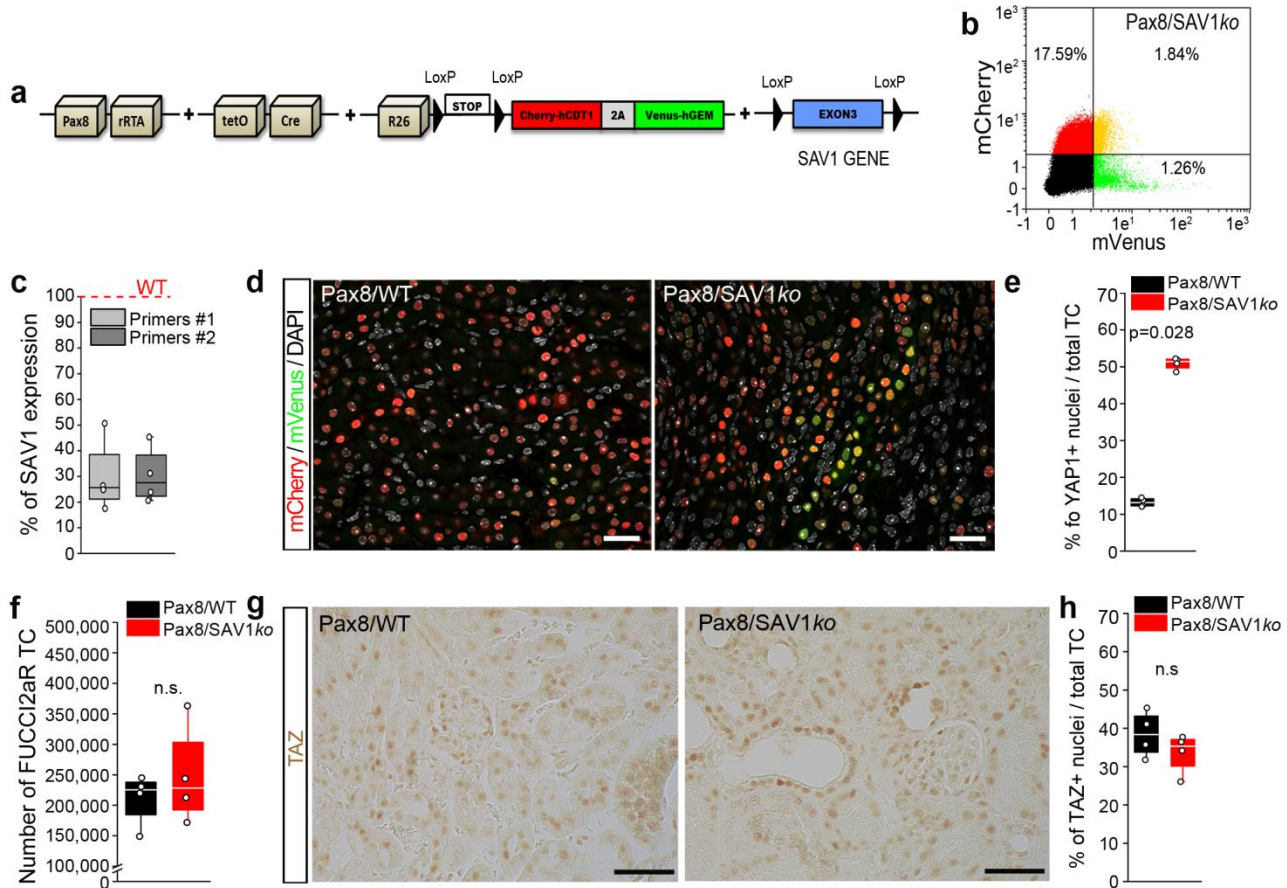

**Supplementary Fig. 7. Generation of Pax8/FUCCI2aR/SAV1 knock-out mice (Pax8/SAV1ko).** (a) The inducible Pax8.r<sup>tTA</sup>;TetO.Cre;R26.FUCCI2aR;SAV1 knock-out (Pax8/SAV1ko) mouse is produced by crossing the Pax8.r<sup>tTA</sup> transgenic mice with TetO.Cre and Rosa26-FUCCI2aR transgenic mice with *SAV1<sup>fl/fl</sup>*. (b) FACS analysis of healthy Pax8/SAV1ko mice (n=8). (c) SAV1 mRNA expression in kidney tissue of Pax8/SAV1ko analysed using two different sets of primers by qRT-PCR. SAV1 expression is normalized on SAV1 expression of healthy kidneys (n=4 replicates are shown). (d) Representative pictures of healthy Pax8/WT and Pax8/SAV1ko mice, showing colours of the reporter. DAPI counterstains nuclei. Bars 25µm. A representative experiment out of 4 is shown. (e) Percentage of YAP1+ tubular cell (TC) nuclei on total TC in healthy Pax8/WT and in Pax8/SAV1ko mice (n=4). (f) Total number of FUCCI2aR TC in healthy Pax8/WT and in Pax8/SAV1ko mice at day 30 after doxycycline induction (n=4). (g) Representative pictures of TAZ expression in healthy Pax8/WT and in Pax8/SAV1ko mice.

mice. Bars 100 $\mu$ m. (h) Percentage of TAZ+ TC nuclei on total TC in healthy Pax8/WT and Pax8/SAV1*ko* mice (n=4). Statistical significance was calculated by two-sided Mann-Whitney test; number on graph represent exact p value. Box-and-whisker plots: line = median, box =25-75%, whisker = outlier (coef. 1.5).

## Ischemic injury

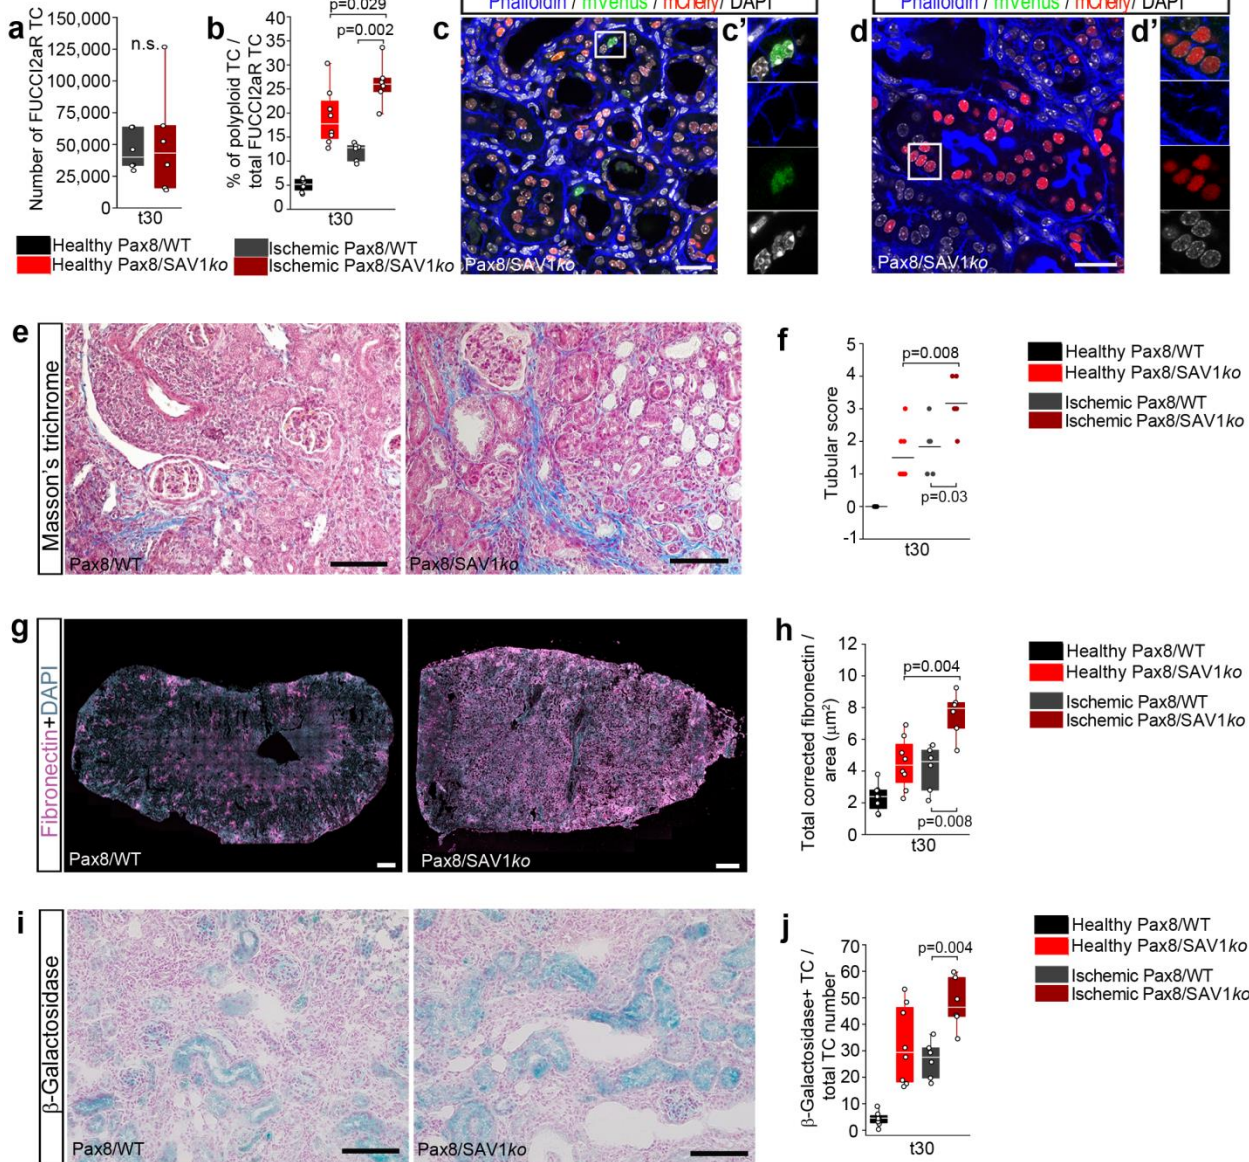

## Human proximal tubular cell

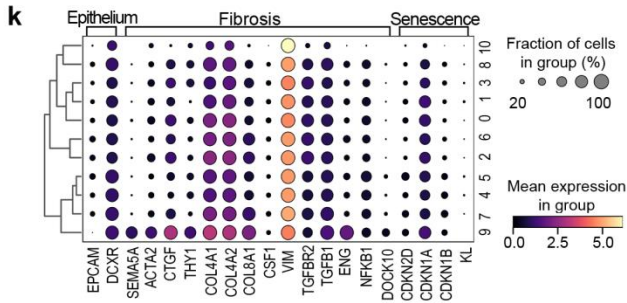

## Nephrotoxic injury

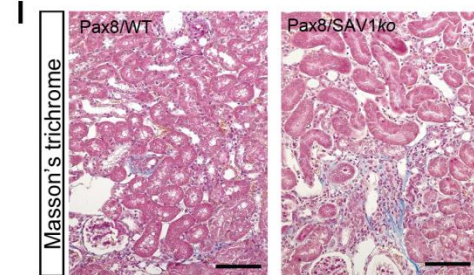

**Supplementary Fig. 8. Acute kidney injury exacerbates polyploidy, fibrosis and senescence in Pax8/SAV1ko mice.** (a) Total number of FUCCI2aR tubular cells (TC) in Pax8/WT and in Pax8/SAV1ko mice at day 30 after ischemic reperfusion injury (IRI) (n=6). (b) Percentage of polyploid TC on the total number of FUCCI2aR TC in healthy Pax8/WT mice and in Pax8/SAV1ko mice (n=8) and at day 30 after IRI (n=6). (c, d) Representative pictures showing TC undergoing endomitosis (two mVenus<sup>+</sup> or mCherry<sup>+</sup> nuclei in the same cell) in Pax8/SAV1ko mice at day 30 after IRI. Phalloidin stains TC and DAPI counterstains nuclei. Bars 25µm. A representative experiment out of 6 is shown. (c', d') Higher magnifications of the inlets shown in (c) and (d) respectively. (e) Representative pictures of Masson's trichrome staining in Pax8/WT and in Pax8/SAV1ko mice at day 30 after IRI (n=6). Bars 100µm. (f) Tubular score evaluated on Masson's trichrome staining in healthy Pax8/WT mice (n=8) and in Pax8/SAV1ko mice and at day 30 after IRI (n=6). (g) Sequential scanning of whole kidney sections stained for fibronectin in Pax8/WT and in Pax8/SAV1ko mice at day 30 after IRI (n=6). DAPI counterstains nuclei. Bars 500µm. (h) Quantification of fibronectin deposition by digital morphometry in healthy Pax8/WT mice and in Pax8/SAV1ko mice (n=8) and at day 30 after IRI (n=6). (i) Senescence-associated  $\beta$ -galactosidase assay in Pax8/WT and Pax8/SAV1ko snap-frozen sections at day 30 after IRI (n=6). Bars 100µm. (j) Percentage of  $\beta$ -galactosidase<sup>+</sup> TC on the total TC number in healthy Pax8/WT and in Pax8/SAV1ko mice (n=8) and at day 30 after IRI (n=6). (k) Dot plot showing epithelial, fibrotic and senescence gene expression in human proximal tubular cell clusters. (l) Representative pictures of Masson's trichrome staining in Pax8/WT and Pax8/SAV1ko mice at day 30 after nephrotoxic injury (n=8). Bars 100µm. Statistical significance was calculated by two-sided Mann-Whitney test; numbers on graphs represent exact p values. Box-and-whisker plots: line = median, box =25-75%, whiskers = outlier (coef. 1.5).



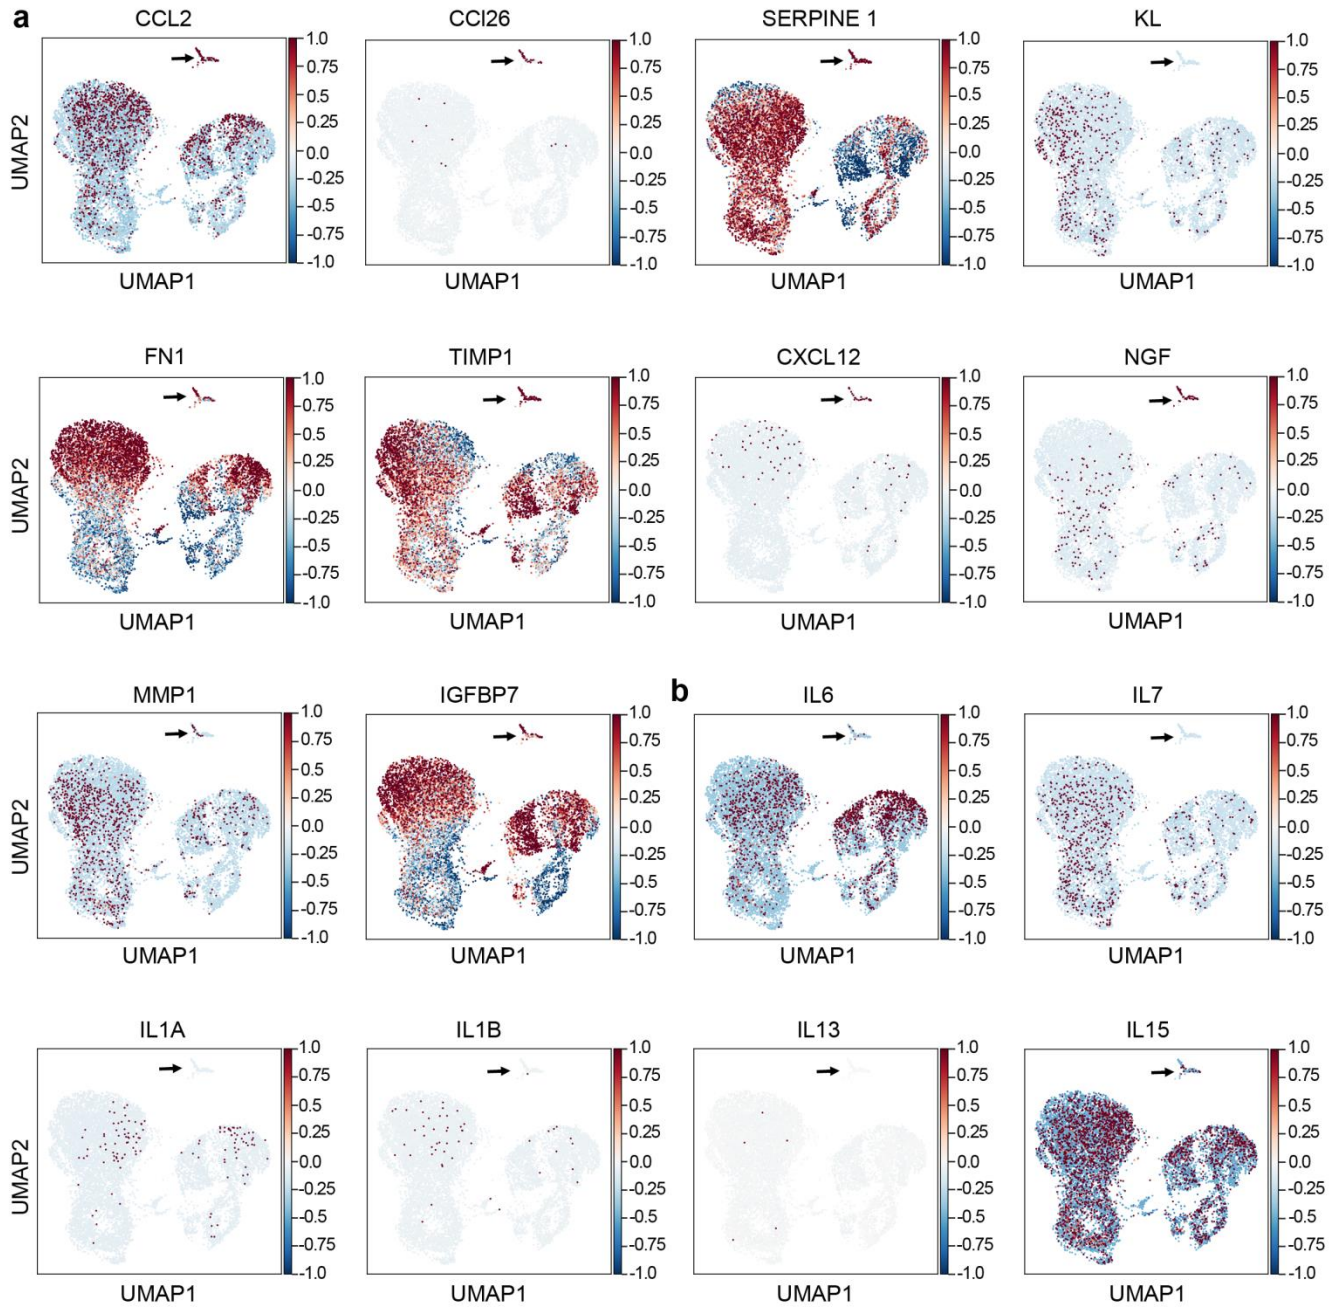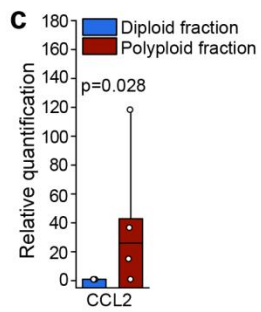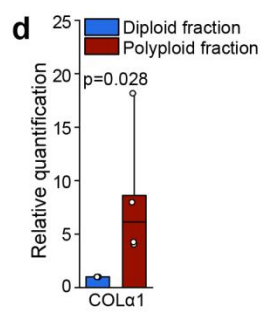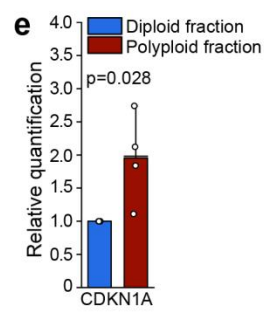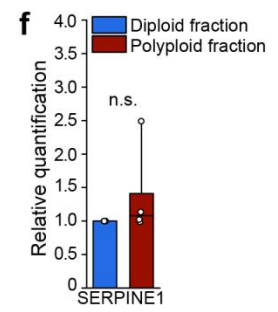

**Supplementary Fig. 9. Senescence-associated secretory phenotype (SASP) of polyploid tubular cells (TC).** (a) UMAP of gene distribution associated with SASP in human proximal tubular cells (hPTC). Arrows indicate polyploid hPTC cluster 9. (b) UMAP of interleukin gene distribution showing that polyploid TC do not express interleukins. (c-f) SASP-associated gene expression of sorted polyploid mCherry-hPTC and diploid mCherry-hPTC (n=4). Statistical significance was calculated by two-sided Mann-Whitney test; numbers on graphs represent exact p values. Bar plots: line = mean, whisker = outlier (coef. 1.5)

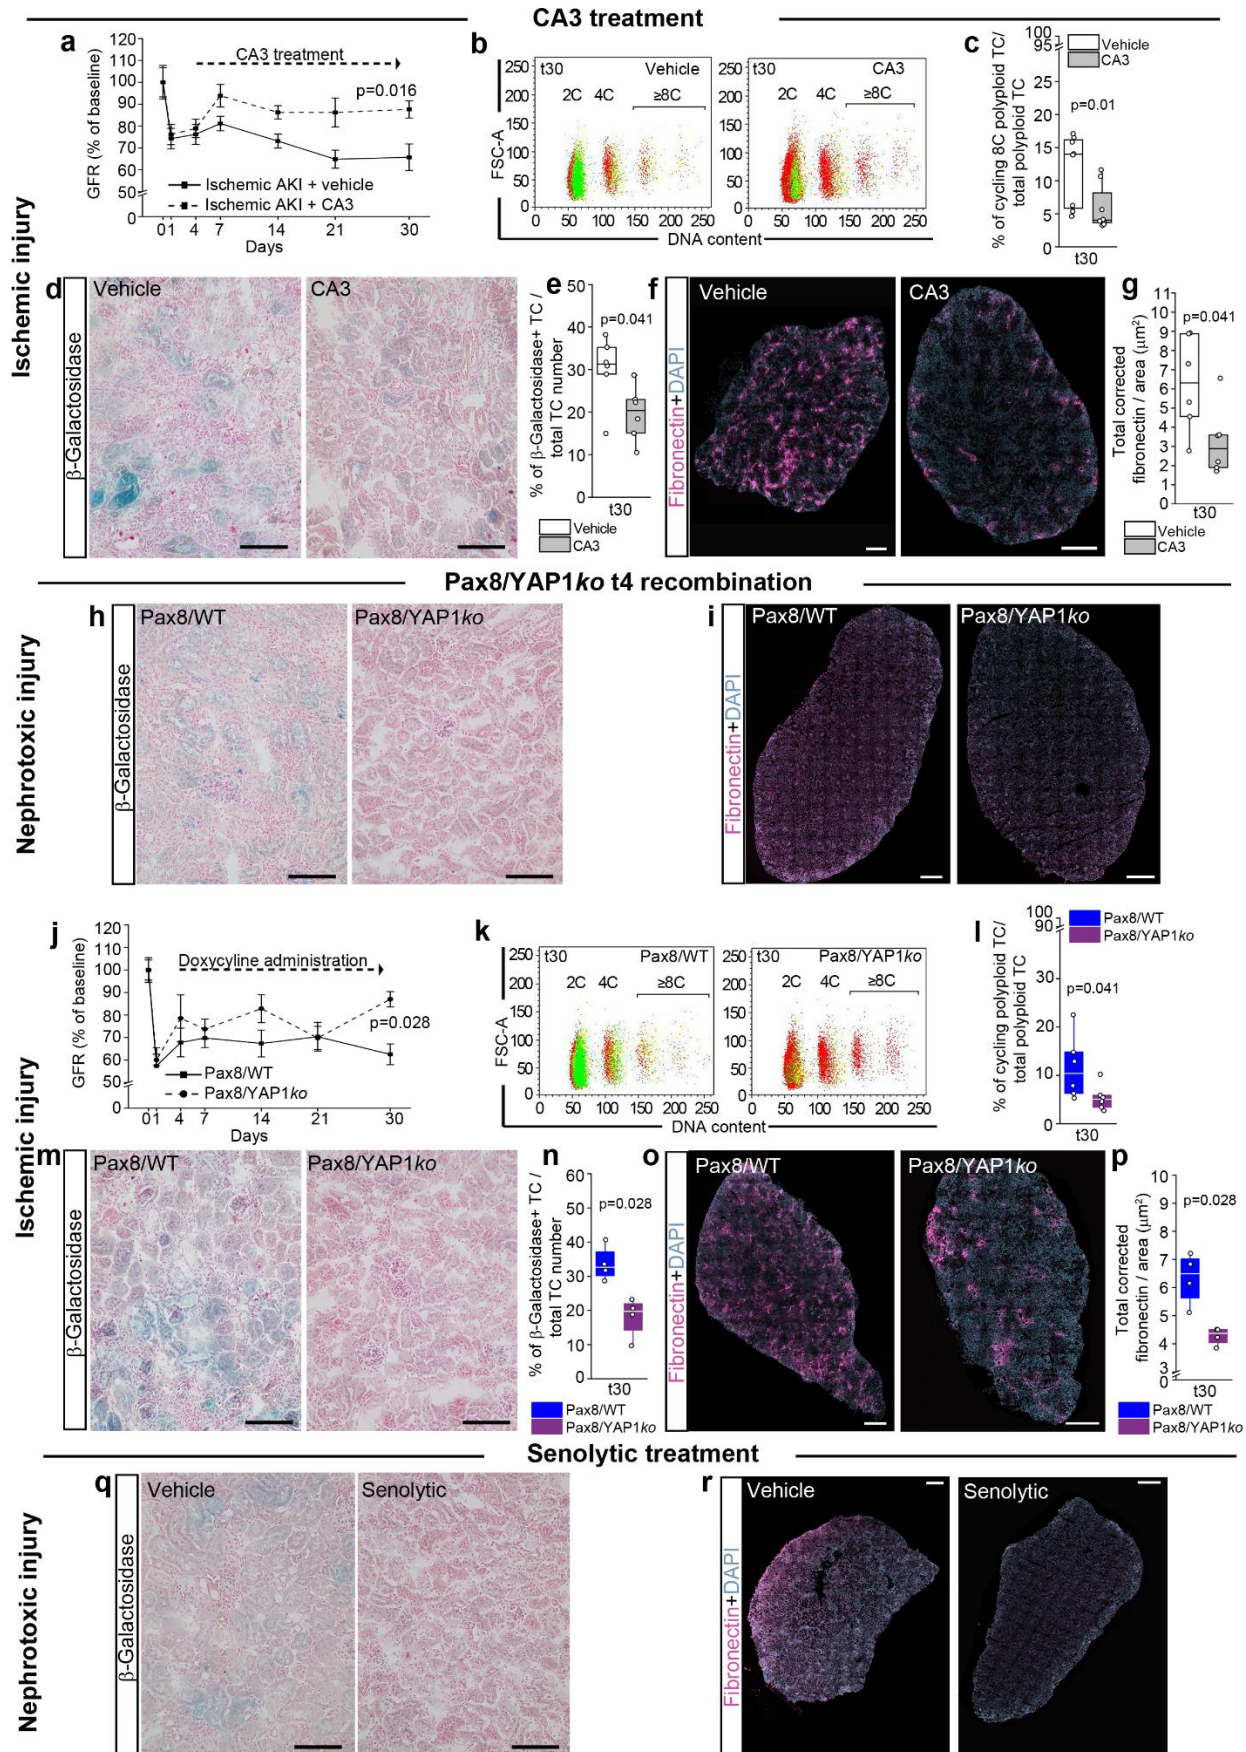

**Supplementary Fig. 10. Time-dependent inhibition of tubular cell (TC) polyploidization attenuates AKI-CKD transition.** (a) Glomerular filtration rate (GFR) measurement in WT mice after ischemic injury (n=6). (b) FACS plots of TC in Pax8/FUCCI2aR mice after ischemic injury, showing diploid (2C), tetraploid (4C) and octaploid or greater ( $\geq 8C$ ) TC (n=8). Colours match the FUCCI2aR reporter. (c) Percentage of cycling polyploid ( $\geq 8C$ ) TC on total polyploid TC in Pax8/FUCCI2aR mice after ischemic injury (n=8). (d) Senescence-associated  $\beta$ -galactosidase assay in WT mice snap-frozen sections at day 30 after ischemic injury (n=6). Bars 100 $\mu$ m. (e) Percentage of  $\beta$ -galactosidase+ TC in WT mice after ischemic injury (n=6). (f) Sequential scanning of kidney sections stained for fibronectin in WT mice at day 30 after ischemic injury (n=6). Bars 500 $\mu$ m. DAPI counterstains nuclei. (g) Quantification of fibronectin deposition by digital morphometry in WT mice after ischemic injury (n=6). (h) Senescence-associated  $\beta$ -galactosidase assay in Pax8/WT and in Pax8/YAP1ko snap-frozen sections 30 days after nephrotoxic injury (n=8). Bars 100 $\mu$ m. (i) Sequential scanning of kidney sections stained for fibronectin in Pax8/WT and in Pax8/YAP1ko at day 30 after nephrotoxic injury (n=8). Bars 500 $\mu$ m. DAPI counterstains nuclei. (j) GFR measurement after ischemic injury (n=4). (k) FACS plots of TC in Pax8/WT and in Pax8/YAP1ko mice after ischemic injury, showing diploid (2C), tetraploid (4C) and octaploid or greater ( $\geq 8C$ ) TC (n=6). Colours match the FUCCI2aR reporter. (l) Percentage of cycling polyploid ( $\geq 8C$ ) TC on total polyploid TC in Pax8/WT and in Pax8/YAP1ko mice after ischemic injury (n=6). (m) Senescence-associated  $\beta$ -galactosidase assay in Pax8/WT and Pax8/YAP1ko snap-frozen sections 30 days after ischemic injury (n=4). Bars 100 $\mu$ m. (n) Percentage of  $\beta$ -galactosidase+ TC after ischemic injury (n=4). (o) Sequential scanning of kidney sections stained for fibronectin in Pax8/WT and in Pax8/YAP1ko at day 30 after ischemic injury (n=4). Bars 500 $\mu$ m. DAPI counterstains nuclei. (p) Quantification of fibronectin deposition by digital morphometry after ischemic injury (n=4). (q) Senescence-associated  $\beta$ -galactosidase assay 30 days after nephrotoxic injury (n=7). Bars 100 $\mu$ m. (r) Sequential scanning of kidney sections stained for fibronectin at day 30 after nephrotoxic injury (n=7).

Bars 500 $\mu$ m. DAPI counterstains nuclei. t4 recombination: doxycycline was given 4 days after nephrotoxic injury. Statistical significance was calculated by two-sided Mann-Whitney test; numbers on graphs represent exact p values. Two-way ANOVA test of significance followed by Bonferroni post-test was employed for graph a. Data are expressed as mean $\pm$ SEM in graph a and j. Box-and-whisker plots: line = median, box =25-75%, whiskers = outlier (coef. 1.5).

## Supplementary Tables

|    | 0          | 1          | 2        | 3        | 4       | 5        | 6          | 7       | 8         | 9        | 10      |
|----|------------|------------|----------|----------|---------|----------|------------|---------|-----------|----------|---------|
| 1  | IL32       | VCAM1      | PDLIM4   | IFITM3   | CDC20   | ATAD2    | MAL        | HMGB1   | TUBA1B    | COL3A1   | RPL19   |
| 2  | NRCAM      | SPP1       | LIMA1    | ITM2B    | CCNB1   | MCM3     | IGFBP7     | STMN1   | ENO1      | SRGN     | RPL14   |
| 3  | ITGAV      | DAB2       | MMP2     | NNMT     | CENPF   | GINS2    | TFAP2B     | SMC4    | IGFBP4    | COL1A2   | RPL6    |
| 4  | ALCAM      | ADIRF      | HOXB9    | FN1      | PTTG1   | CLSPN    | PDLIM4     | PCLAF   | LMNA      | COL1A1   | RPS24   |
| 5  | MFGE8      | PDZK1IP1   | KRT19    | FTL      | CDKN3   | MCM7     | CD24       | PTMA    | HMG2      | NR2F1    | RACK1   |
| 6  | CDH6       | CRYAB      | L1CAM    | CST3     | DLGAP5  | FEN1     | SAT1       | TYMS    | NPM1      | COL5A2   | RPL7A   |
| 7  | COL18A1    | CDH6       | HSPG2    | NEAT1    | TPX2    | PCNA     | IRX2       | DEK     | HNRNPC    | SPARC    | EEF1B2  |
| 8  | PLAU       | MT1E       | GSTP1    | LTBP3    | CKS2    | TYMS     | TPM2       | CENPF   | KRT18     | BGN      | RPS23   |
| 9  | TPT1       | HIF1A      | CD81     | HIF1A    | H2AFZ   | MCM4     | TFCP2L1    | MKI67   | HSPD1     | IGFBP6   | RPS3A   |
| 10 | PADI2      | SERPINE2   | TPM2     | AKR1C3   | BIRC5   | MCM5     | IGFBP2     | NUCKS1  | YBX1      | TAGLN    | RPL5    |
| 11 | AL355916.1 | TNFSF10    | LOXL2    | IGFBP7   | MKI67   | NASP     | SERPINE2   | TK1     | PPP1R14B  | TPM2     | S100A10 |
| 12 | TPM1       | KCNJ15     | RHOBTB3  | MALAT1   | UBE2S   | HELLS    | FKBP10     | TPX2    | HNRNPM    | RCN3     | RPL9    |
| 13 | OPTN       | TINAGL1    | FCGRT    | HTRA1    | NUSAP1  | DNAJC9   | CD59       | NUSAP1  | EIF5A     | COL5A1   | RPL13   |
| 14 | PXDN       | SERPINA1   | AMIGO2   | SPP1     | HMMR    | TK1      | GNPMB      | MYBL2   | PRDX1     | SERPINH1 | RPLP1   |
| 15 | FN1        | PTER       | S100A11  | SERPINA1 | TUBB4B  | PCLAF    | LGALS3     | ANLN    | HMGB1     | FSTL1    | RPL15   |
| 16 | ZBTB20     | ABCC3      | HOXB3    | PDZK1IP1 | CCNB2   | HIST1H4C | HIPK2      | CKS1B   | ACTB      | CKAP4    | RPS4X   |
| 17 | MACF1      | MPC2       | COL1A1   | CLU      | HMGB2   | MYBL2    | FHL2       | TOP2A   | XRCC6     | COL12A1  | RPS27A  |
| 18 | SVIL       | SLC9A3R1   | GAS6     | CTSB     | CEP55   | DEK      | DCN        | H2AFZ   | HNRNPA1   | LMO7     | VIM     |
| 19 | EEF1A1     | TRIM38     | GSN      | SLC6A6   | TUBA1C  | H2AFZ    | GYPC       | HSP90A1 | PTMA      | TIMP1    | RPL10   |
| 20 | RAB3B      | PLA2G16    | FHL2     | GPX3     | ANLN    | DNMT1    | SIM2       | TUBB    | RPL22L1   | DDR2     | RPL11   |
| 21 | RRAS2      | ANPEP      | COL7A1   | HLA-A    | KPNA2   | BRCA1    | BRI3       | ASPM    | PLK2      | COL6A2   | RPS7    |
| 22 | S100A6     | CTSB       | PTBP3    | IFITM2   | HMGB1   | RRM2     | EVA1B      | TUBA1B  | HNRNPA2B1 | LRRC17   | RPS13   |
| 23 | ADGRG1     | SIGIRR     | ADAMTS5  | SLC7A7   | SMC4    | GMNN     | TCIM       | NASP    | PRELID1   | CCDC80   | RPL27   |
| 24 | PRDX5      | ADGRG1     | NDN      | RPL3     | HMG2    | UBE2T    | CTSD       | CENPW   | PSMB1     | COL6A3   | RPL35A  |
| 25 | AMIGO2     | RNASSET2   | CSR1     | MT1X     | MAD2L1  | ORC6     | FTH1       | CDKN3   | HNRNPD    | CALU     | FAU     |
| 26 | ATP5F1E    | C19orf33   | THBS1    | NUPR1    | DTYMK   | HSPD1    | PTH1R      | DTYMK   | HNRNPH3   | ENG      | RPL35   |
| 27 | MYL9       | AIF1L      | SOX4     | CGNL1    | PTGES3  | PPM1G    | HOXB3      | TMPO    | PRMT1     | MEG3     | RPL13A  |
| 28 | AP1M2      | ITGA3      | TACSTD2  | VCAM1    | CCNA2   | DHFR     | GSN        | RANBP1  | OAZ1      | POSTN    | RPS18   |
| 29 | JUP        | MGST1      | FBLIM1   | ABCC3    | BUB1    | USP1     | SFRP1      | HMGB2   | HSPE1     | MARCKS   | RPL23A  |
| 30 | WWTR1      | PLOD2      | BICD1    | CRYAB    | PBK     | TMPO     | CD81       | BIRC5   | PPIA      | CAVIN1   | RPL10A  |
| 31 | LTBP2      | MT1X       | SRP14    | TIMP1    | CKS1B   | HNRNPA1B | KCNJ16     | RRM2    | TUBB4B    | MYL9     | RPL32   |
| 32 | VAT1       | LINC01781  | TAGLN    | TKT      | TOP2A   | FAM111B  | FBXO32     | PTTG1   | HSPA5     | ISLR     | NACA    |
| 33 | SPINT1     | SCEL       | LUM      | UGT2B7   | ASPM    | DUT      | CD9        | HMG2    | C1QBP     | COL6A1   | RPL12   |
| 34 | DCBLD2     | THBS2      | TMSB4X   | MMP14    | JPT1    | CDT1     | GMDS       | KPNA2   | FABP5     | MEST     | RPL21   |
| 35 | AHNAK2     | CHCHD10    | PAWR     | TFPI2    | CDCA3   | HMGB2    | PON2       | CEP55   | PHB       | PTX3     | RPLP2   |
| 36 | QPR1       | MT2A       | COL4A1   | CDH6     | KIF20B  | SIVA1    | C5orf38    | TUBB4B  | PSMB6     | PDLIM2   | RPS2    |
| 37 | SERF2      | KCNK3      | AKR1B1   | MGST1    | CENPW   | SRSF7    | IMPA2      | SMC2    | TPM3      | CAVIN3   | RPS3    |
| 38 | TMEM30A    | CPD        | TSPAN1   | APLP2    | RAN     | RRM1     | LINC01116  | DLGAP5  | HSP90B1   | COX7A1   | RPL3    |
| 39 | S100A10    | PTPN1      | FXYD6    | VAMP5    | DEPDC1  | CHAF1A   | AC004982.2 | CCNB1   | NME1      | HHIP     | RPLP0   |
| 40 | IL18       | FGFR1      | ATP1A1   | TSC22D1  | HSP90A1 | CENPM    | IFITM2     | HNRNPD  | EFHD2     | CREB3L1  | RPL4    |
| 41 | JAK1       | LPP        | RND3     | KCNQ10T1 | PLK1    | MCM6     | GLRX       | CDC20   | KRT8      | CDC42E3  | RPS20   |
| 42 | ATOX1      | DBI        | CDA      | CYP3A5   | HSPD1   | PTMA     | LAMC2      | DNMT1   | HSP90AB1  | EVA1B    | RPS12   |
| 43 | SERPINE1   | AC003092.1 | SCNN1A   | RARRES3  | KIF4A   | RANBP1   | FXYD2      | H2AFV   | STOML2    | CALD1    | RPS6    |
| 44 | TMSB10     | GLDC       | RBP1     | TPT1     | TACC3   | SRSF2    | COL7A1     | CENPM   | RPS26     | CDH13    | RPSA    |
| 45 | CCND1      | SLCO4C1    | H3F3A    | CA12     | RAD21   | HMG2     | CRNDE      | UBE2S   | RAN       | SRM      | RPL18A  |
| 46 | DYSF       | AHNAK2     | FOLR1    | FTH1     | SFPQ    | TUBA1B   | IVNS1ABP   | HMMR    | ANXA2     | ALDH1L2  | HINT1   |
| 47 | SCD        | MT-CO2     | SSC4D    | TNFRSF1A | GTSE1   | HMGB1    | UCHL1      | ANP32B  | SERBP1    | MYDGF    | RPS25   |
| 48 | SLN        | MT-ND4     | LOXL1    | TGM2     | STMN1   | BAR1     | SCNN1A     | CCNA2   | SNRPE     | MEIS2    | RPS5    |
| 49 | RPL34      | OGFRL1     | MAL      | TYMP     | ARL6IP1 | HNRNPD   | FKBP1A     | CBX5    | LDHA      | ITGA5    | RPL31   |
| 50 | COMMD6     | FTL        | HOXB-AS3 | EEF2     | DEK     | PA2G4    | PLEKHA1    | RRM1    | HNRNPA3   | DKK1     | RPL24   |

**Supplementary Table 1.** List of the first 50 marker genes of human proximal tubular cell (hPTC) clusters. Light orange boxes represent genes shared with cluster 8 from mouse proximal tubular cells (PTC).

|    | 0             | 1        | 2        | 3          | 4             | 5        | 6         | 7         | 8             | 9        |
|----|---------------|----------|----------|------------|---------------|----------|-----------|-----------|---------------|----------|
| 1  | Slc5a2        | Atp11a   | Gatm     | Cyp4b1     | Cox4i1        | Nudt19   | Cyb5a     | Mylk      | Ptma          | Tmsb4x   |
| 2  | Ccdc141       | Slc6a18  | Car2     | Gm45792    | Spink1        | Cndp2    | Miox      | Zbtb20    | H2afz         | H2-D1    |
| 3  | Slc6a19       | Slc7a13  | Aldob    | Slc22a8    | Cox8a         | Gclm     | Ubb       | Luc7l2    | Stmn1         | Cd52     |
| 4  | Slc5a12       | Slco1a1  | Mif      | Timp3      | Cox6a1        | Prdx1    | Ttc36     | Slc22a30  | Ran           | Srgn     |
| 5  | Snhg11        | Slc27a2  | Ftl1     | Ces1f      | Cox7c         | Cyb5a    | Rida      | Pkhd1     | Ube2s         | Btg1     |
| 6  | Maf           | Ly6a     | Slc25a4  | Slc22a28   | Cox7a2        | Ttc36    | Cycs      | Ddx17     | Tuba1b        | Ptprc    |
| 7  | Fut9          | Slc5a8   | Oat      | Car12      | Guca2b        | Rida     | Fxyd2     | Slc22a28  | Cdk1          | H2-K1    |
| 8  | Slc34a3       | Napsa    | Atp5g1   | BC005561   | Fth1          | Lap3     | Scp2      | Tef       | H2afv         | Coro1a   |
| 9  | Chka          | Kap      | Atp6v1g1 | Malat1     | Uqcr11        | Mpv17l   | Akr1a1    | Trim7     | 1810037117Rik | Junb     |
| 10 | Slc4a4        | Ggt1     | Fxyd2    | Slc47a1    | Ndufa4        | Gstm1    | Akr1c21   | Gm42418   | Birc5         | B2m      |
| 11 | Folh1         | Slc22a6  | Ass1     | Atp11a     | Dbi           | Acy3     | Prdx1     | Vegfa     | Tubb5         | Fxyd5    |
| 12 | Slc7a8        | Mep1a    | Tpt1     | Slc17a3    | Gpx1          | Gpx4     | Ass1      | Ogt       | Hmgb1         | Shisa5   |
| 13 | Cgnl1         | Lpl      | Akr1a1   | Mlxipl     | Cox6c         | Cda      | Eef1a1    | Pnlsr     | Gclm          | Lcp1     |
| 14 | Kcnq1ot1      | Slc17a3  | Ldhd     | Slc34a1    | Cox6b1        | Dbi      | Eif1      | Fus       | Ywhah         | Laptm5   |
| 15 | Gm26917       | Mat2a    | Park7    | Gm26917    | Ndufb9        | Mpc1     | Pecr      | Rsrp1     | Hmgb2         | Sh3bgrf3 |
| 16 | Spp2          | Cd36     | Oxct1    | Slc22a30   | Cox7b         | Acadm    | Gapdh     | Itpr1     | Dut           | Rac2     |
| 17 | Plekha1       | Slc22a30 | Rpl37a   | Tns1       | Tpt1          | Hibadh   | Slc25a5   | Nisch     | Dek           | Arhgdib  |
| 18 | Car12         | Cyp4b1   | Gpx1     | Zbtb20     | Ass1          | Acaa1b   | Dbi       | Rbm25     | Ccdc34        | Ier2     |
| 19 | Timp3         | Nat8f6   | Rps29    | Snx29      | mt-Cytb       | Eci3     | Aldob     | Phldb2    | H3f3a         | H2-Q7    |
| 20 | Malat1        | Ces1f    | Atp5e    | Cyp4a12a   | mt-Nd4        | Me1      | Msrb1     | Gm45792   | Hmgn1         | Cd53     |
| 21 | Adra1a        | Nat8     | Rpl28    | Neat1      | Rplp1         | Suc1g1   | Tpt1      | Srsf11    | Ube2c         | Psmb8    |
| 22 | Neu1          | Cyp2e1   | Cox5b    | Col4a4     | Ndufa13       | Msrb1    | Acy3      | Dst       | Rrm2          | AW112010 |
| 23 | Steap2        | Ces2c    | Fbp1     | AC160336.1 | mt-Atp6       | Txn1     | Prdx5     | Mlxipl    | S100a11       | Lsp1     |
| 24 | Slc7a7        | Ly6e     | Slc25a3  | Pde4d      | Prdx5         | Slc25a39 | Mpc1      | Kcnq1ot1  | Sp25          | lfng1    |
| 25 | Snx29         | Agps     | Acaa2    | Cyp2j13    | mt-Co3        | Scp2     | Cystm1    | Tet2      | Nudc          | Adgre5   |
| 26 | Slc43a2       | Slc22a2  | Idh1     | Kcnj15     | Cox5b         | Bphl     | Ybx1      | Ash1l     | Pbk           | Ltb      |
| 27 | Nktr          | Mlxipl   | Atp5h    | Enpp2      | mt-Nd2        | Prdx5    | Chchd2    | Slc6a6    | Calm2         | Zfp36l2  |
| 28 | Cpeb3         | Gm45792  | Pcbd1    | Syne2      | Cox5a         | Ech1     | Gpx1      | Zcchc7    | Hmgn2         | Btg2     |
| 29 | Ptprd         | Slco3a1  | Chchd2   | Arhgap5    | Ttc36         | Acat1    | Suc1g1    | Pde4d     | Pclaf         | Actb     |
| 30 | Slc3a2        | Slc22a12 | Uqcrh    | Slc5a2     | Atp5j2        | Vdac1    | Park7     | Slc25a36  | Clic1         | Cytip    |
| 31 | Kif12         | Slc17a1  | Rpl36    | Trabd2b    | Uqcrh         | Keg1     | Hist1h2bc | Nmrk1     | Dcca3         | Ly6e     |
| 32 | Cpeb4         | Acsm3    | Atp5a1   | Cyp2e1     | Cyba          | Phyh     | Txn1      | Nuak2     | Nucks1        | Tmsb10   |
| 33 | Ogt           | Ddx5     | Cox6c    | Igf1r      | Rpl39         | Them7    | Vdac1     | Slc6a20b  | Rps27l        | Stk17b   |
| 34 | Neat1         | Ugt3a2   | Serf2    | Slc22a6    | Hint1         | Etfb     | Ech1      | Abcc2     | Tubb4b        | Hcst     |
| 35 | Ank3          | Zbtb20   | Rps8     | Pnlsr      | Atp5l         | Acadl    | Txn1c17   | Cspp1     | Ranbp1        | Itgal    |
| 36 | 4921539H07Rik | Col4a3   | Rps24    | Slc13a3    | mt-Nd1        | Cystm1   | Gnas      | Clk1      | Tk1           | Selp1g   |
| 37 | Atp2a2        | Slc47a1  | Fabp3    | Atp2a2     | Rps29         | Eif5a    | Cda       | Ttc14     | Cdc20         | S100a6   |
| 38 | Cyp2d26       | Tmigd1   | Mdh1     | Golga4     | Atpif1        | Pecr     | Cisd1     | Cpeb4     | Ccna2         | Dusp2    |
| 39 | Prodh2        | Neat1    | Atp5o-1  | Slc4a4     | Ndufa6        | Gapdh    | Akr7a5    | Prpf38b   | Ppia          | Dock2    |
| 40 | Ctnbp2        | Tmem176a | Atp5g3   | Col4a3     | Fxyd2         | Adh1     | Uqcrf1    | Tmem245   | Dbi           | Ptpn18   |
| 41 | Srrm2         | Slc5a10  | Rplp0    | Prpf4b     | Eef1a1        | Rps2     | Hibadh    | Dgkh      | Tyms          | Arcp1b   |
| 42 | Col27a1       | Stx16    | Uqcrb    | Ggt1       | Ndufa2        | Khk      | Atp5b     | Tfcp2     | Txn1          | Ms4a4b   |
| 43 | Golga4        | Ghr      | Rpl23    | AC149090.1 | Gpx4          | Amacr    | Mdh1      | Krit1     | Nusap1        | Ptprcap  |
| 44 | Rab11fip3     | Trim7    | Atp5l    | Slc5a12    | Rpl41         | Uqcrf1   | Keg1      | Trps1     | Snrpe         | B4galnt1 |
| 45 | AC149090.1    | Nudt19   | Rpl19    | G6pc       | mt-Co2        | Pank1    | Chchd10   | Kidins220 | Ubalcl2       | Ier5     |
| 46 | D630023F18Rik | Serpinf2 | Rps23    | Ptprk      | Rps21         | Akr1c21  | Ldhd      | Snx29     | Actg1         | Itga4    |
| 47 | Syne2         | Tmem205  | Atp5k    | Slc6a6     | Rps19         | H2afj    | Gabarap   | Malat1    | S100a10       | Gimap6   |
| 48 | Itpr2         | Abcc2    | Chchd10  | Slc6a19    | Uqcrq         | Iscu     | Tpi1      | Lrp2      | Cks2          | Apbb1ip  |
| 49 | Rsrp1         | Slc13a3  | Rps21    | Trpm7      | Ndufb8        | Rpl17    | Rpl6      | Gm26917   | H2afx         | Rps27    |
| 50 | Luc7l2        | Tmbim6   | Uqcr10   | Vegfa      | 2010107E04Rik | Gnas     | Dhrs4     | Rbm39     | Hmnr          | Celf2    |

**Supplementary Table 2.** List of the first 50 marker genes of mouse proximal tubular cell (PTC) clusters.

Light orange boxes represent genes shared with polyploid clusters of human proximal tubular cells (hPTC).



| <b><i>Patients</i></b>                                                             |                         |
|------------------------------------------------------------------------------------|-------------------------|
| Number                                                                             | <b>45</b>               |
| Gender (male)                                                                      | <b>33/45 (73.3%)</b>    |
| Ethnicity (white)                                                                  | <b>45/45 (100.0%)</b>   |
| eGFR at baseline (mL/min/1.73mq)                                                   | <b>75.2 ±29.8</b>       |
| eGFR < 90 mL/min/1.73mq                                                            | <b>27/45 (60.0%)</b>    |
| CKD (eGFR < 60 mL/min/1.73mq) at baseline                                          | <b>15/45 (33.3%)</b>    |
| CKD (eGFR < 60 mL/min/1.73mq) at baseline in late biopsies stained for fibronectin | <b>6/16 (37.5%)</b>     |
| Age at biopsy (years)                                                              | <b>52 ±17</b>           |
| <b><i>Histology</i></b>                                                            |                         |
| Primary glomerular                                                                 | <b>15/45 (33.3%)</b>    |
| Secondary FSGS                                                                     | <b>12/45 (26.7%)</b>    |
| Tubular                                                                            | <b>8/45 (17.8%)</b>     |
| Vascular                                                                           | <b>5/45 (11.1%)</b>     |
| Other (DN, Transplant)                                                             | <b>5/45 (11.1%)</b>     |
|                                                                                    |                         |
| <b><i>Kidney function at biopsy</i></b>                                            |                         |
| Serum creatinine (mg/dL)                                                           | <b>1.8 [1.13-2.65]</b>  |
| eGFR (mL/min/1.73mq)                                                               | <b>41.0 [25.0-70.0]</b> |
| eGFR < 60 mL/min/1.73mq                                                            | <b>30/45 (66.7%)</b>    |
| eGFR < 30 mL/min/1.73mq                                                            | <b>18/45 (40.0%)</b>    |
| ESKD                                                                               | <b>0/45 (0%)</b>        |
|                                                                                    |                         |
| <b><i>Previous AKI episode</i></b>                                                 |                         |
| Time AKI-to-biopsy (years)                                                         | <b>0.15 [0.03-0.49]</b> |
| Time AKI-to-biopsy (days)                                                          | <b>53 [10-179]</b>      |
| Early group (2 – 15 days)                                                          | <b>14/45 (31.1%)</b>    |
| Late group (>15 days)                                                              | <b>31/45 (68.8%)</b>    |
| AKI stages                                                                         |                         |
| - AKIN 1                                                                           | <b>25/45 (55.6%)</b>    |
| - AKIN 2                                                                           | <b>11/45 (24.4%)</b>    |
| - AKIN 3                                                                           | <b>9/45 (20.0%)</b>     |
| Two or more AKI episodes prior to biopsy                                           | <b>9/45 (20.0%)</b>     |
|                                                                                    |                         |
| <b><i>Last follow-up (LFU)</i></b>                                                 |                         |
| LFU, time from biopsy (years)                                                      | <b>1.3 [0.4-2.8]</b>    |
| Serum creatinine LFU (mg/dL)                                                       | <b>1.22 [0.99–1.90]</b> |
| eGFR at LFU (mL/min/1.73mq)                                                        | <b>51.5 [27.4-70.1]</b> |
| eGFR < 90 mL/min/1.73mq                                                            | <b>40/45 (88.9%)</b>    |
| CKD (eGFR < 60 mL/min/1.73mq) at LFU                                               | <b>25/45 (55.6%)</b>    |
| ESKD at LFU                                                                        | <b>7/45 (15.6%)</b>     |

**Supplementary Table 3.** Clinical information of patients affected by CKD after AKI.
